# Supplementary material
Source: publisher figshare collection journal article supplement (https://acs.figshare.com/ndownloader/files/20078888)
Supplement: Supplementary file 1 [file 20078888]

**Hydrotreating of guaiacol and acetic acid blends over Ni<sub>2</sub>P/ZSM-5  
catalyst: elucidating molecular interactions during bio-oil upgrading**

S. Gutierrez-Rubio<sup>a</sup>, I. Moreno<sup>a,b\*</sup>, D.P. Serrano<sup>a,b</sup>, J.M. Coronado<sup>a\*,+</sup>

*<sup>a</sup> Thermochemical Processes Unit. IMDEA Energy Institute, Avda. Ramón de la Sagra 3,  
Móstoles, Madrid, Spain*

*<sup>b</sup> Chemical and Environmental Engineering Group, ESCET, Universidad Rey Juan Carlos,  
c/ Tulipán s/n, Móstoles, Madrid, Spain*

---

<sup>+</sup> Present address: Instituto de Catálisis y Petroleoquímica, CSIC, c/ Marie Curie, 2, Cantoblanco, Madrid, E28049. Spain.

**Table S1.** Chromatographic response factors in the relevant concentration range of the main chemicals identified during the hydrotreating of guaiacol and acetic acid blends.

| <b>Chemical</b>   | <b>Response factor</b> |
|-------------------|------------------------|
| Guayacol          | 9.28                   |
| Acetic Acid       | 27.81                  |
| Cyclohexane       | 6.44                   |
| Methyl Acetate    | 19.07                  |
| Ethyl Acetate     | 15.48                  |
| Anisole           | 8.95                   |
| Guaiacol Acetate  | 12.67                  |
| Phenol            | 7.94                   |
| Ethyl Guaiacol    | 7.32                   |
| Ethyl Cyclohexane | 7.29                   |
| Ethanol           | 16.48                  |
| Acetone           | 14.84                  |
| Catechol Acetate  | 14.03                  |
| Diacetoxybenzene  | 15.81                  |
| Catechol          | 10.66                  |
| Ethyl Catechol    | 10.43                  |
| Apocynin          | 11.47                  |
| Others            | 11.47                  |
| 2 Ethyl Phenol    | 7.32                   |

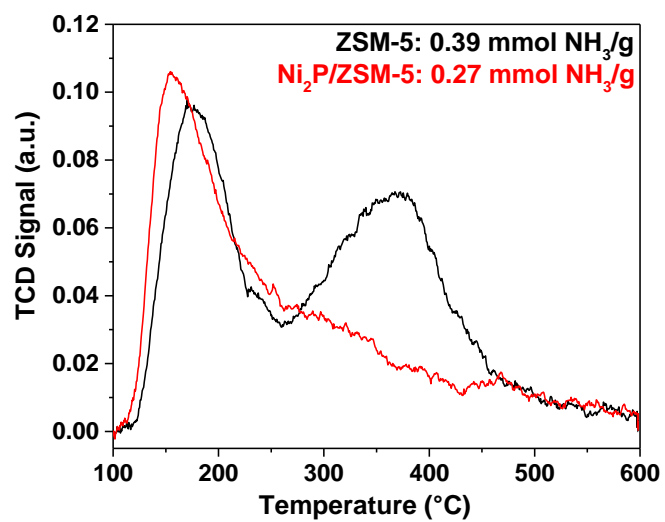

**Figure S1.** NH<sub>3</sub>-TPD profiles of the raw ZSM-5 zeolite and the Ni<sub>2</sub>P/ZSM-5 catalyst.

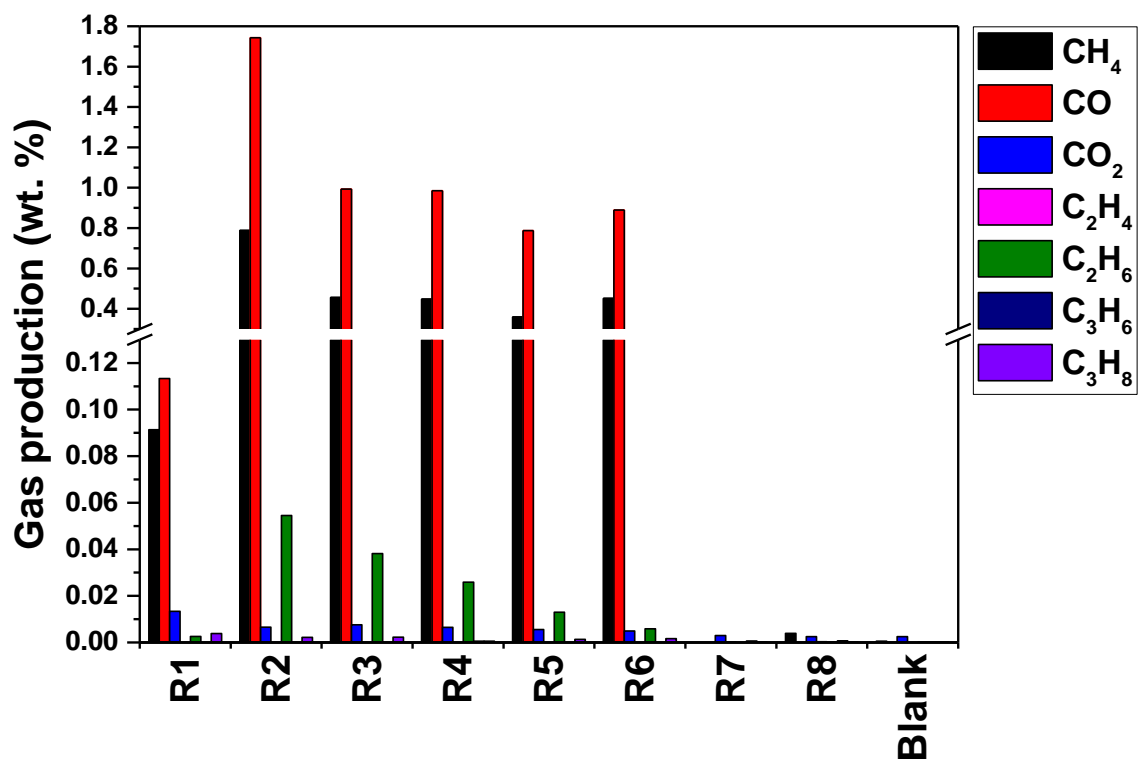

**Figure S2.** Gas production in catalytic reactions performed in this work. See Table 1 for reference of the of the tests conditions.

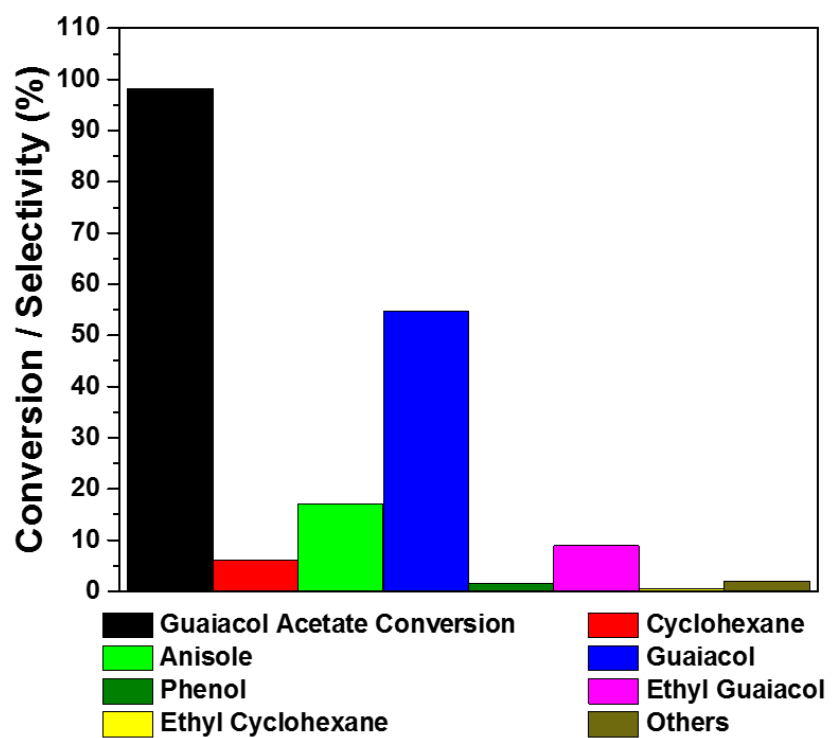

**Figure S3.** Conversion and products selectivity in catalytic HDO reaction of guaiacol acetate (R11) at 260 °C and 40 bar H<sub>2</sub>.

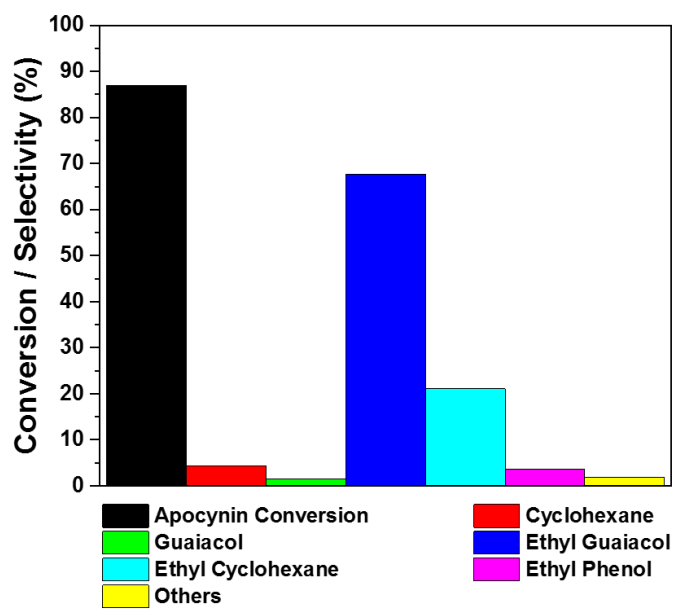

**Figure S4.** Conversion and products selectivity in catalytic HDO reaction of apocynin (R12) at 260 °C and 40 bar H<sub>2</sub>.

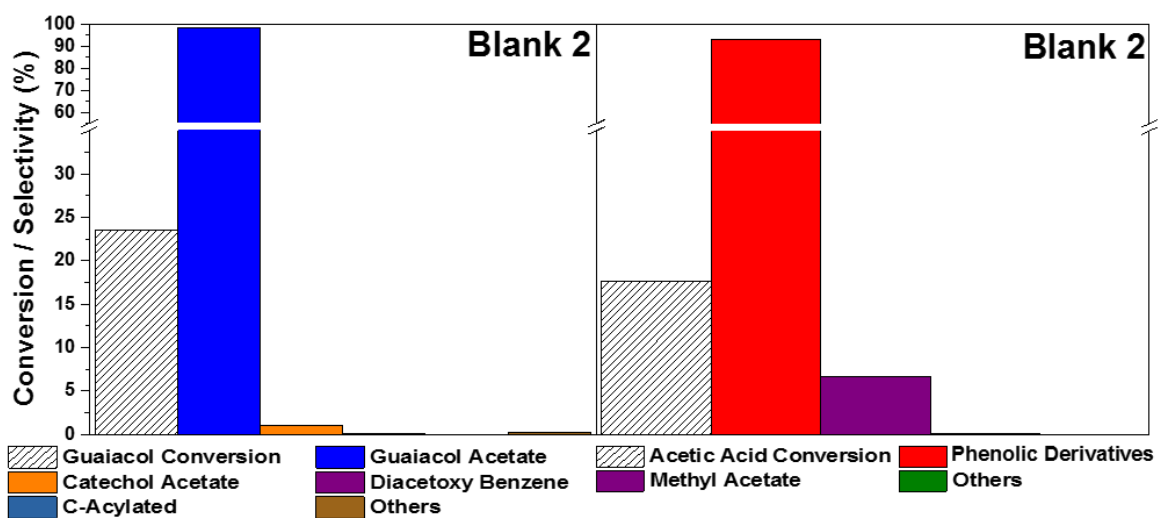

**Figure S5.** Conversion and products selectivity respect to guaiacol (Left) and acetic acid (Right) obtained in blank catalytic reaction of the blend at 260 °C and hydrogen atmosphere (10 bar H<sub>2</sub>) (Blank 2).
